# Supplementary material for: Mechanistic understanding of tungsten oxide in-plane nanostructure growth via sequential infiltration synthesis
Source: Royal Society of Chemistry journal article supplement (doi:10.1039/c7nr07642h), 2018-01-01
Supplement: c7nr07642h1.pdf [file c7nr07642h1.pdf]

## Supporting information

# Mechanistic Understanding of Tungsten Oxide In-Plane Nanostructure Growth via Sequential Infiltration Synthesis

Jae Jin Kim,<sup>†</sup> Hyo Seon Suh,<sup>‡</sup> Chun Zhou,<sup>‡</sup> Anil U. Mane,<sup>§</sup> Byeongdu Lee,<sup>⊥</sup> Soojeong Kim,<sup>†</sup>  
Jonathan D. Emery,<sup>||</sup> Jeffrey W. Elam,<sup>§</sup> Paul F. Nealey,<sup>‡</sup> Paul Fenter,<sup>†</sup> Timothy T. Fister\*,<sup>†</sup>

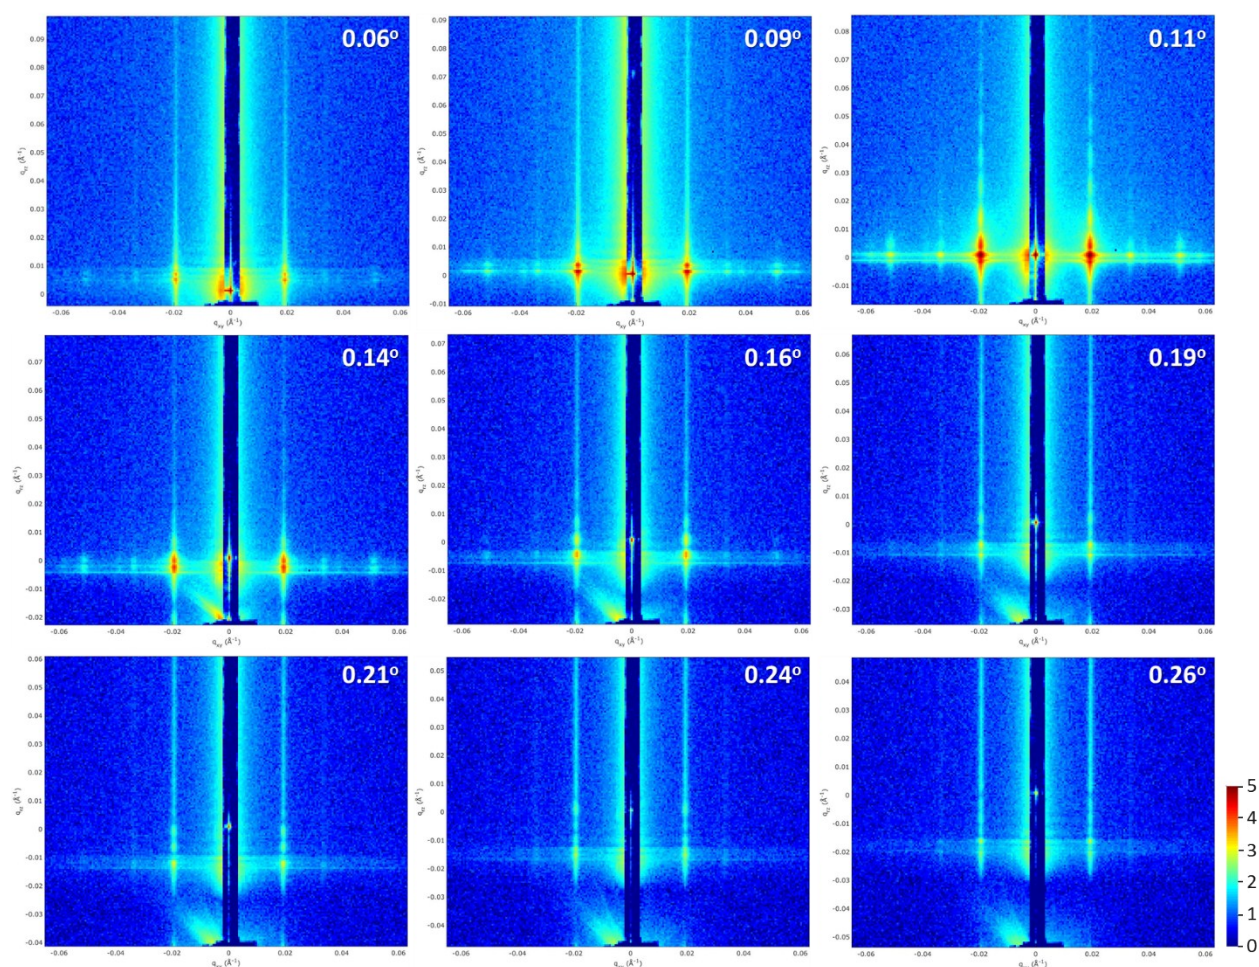

**Figure S1** Grazing-incidence small-angle X-ray scattering (GISAXS) patterns from as-prepared self-assembled block copolymer (BCP) film of poly(styrene-*block*-methyl methacrylate (PS-*b*-PMMA) with  $M_n = 46k/21k$  used as a template. The incident angle ( $\alpha_i$ ) of X-ray beam against the films was scanned from  $0.06^\circ$  to  $0.26^\circ$  as shown in the inset. The x and y axes are  $q_{xy}$  and  $q_{z,z}$ , respectively.

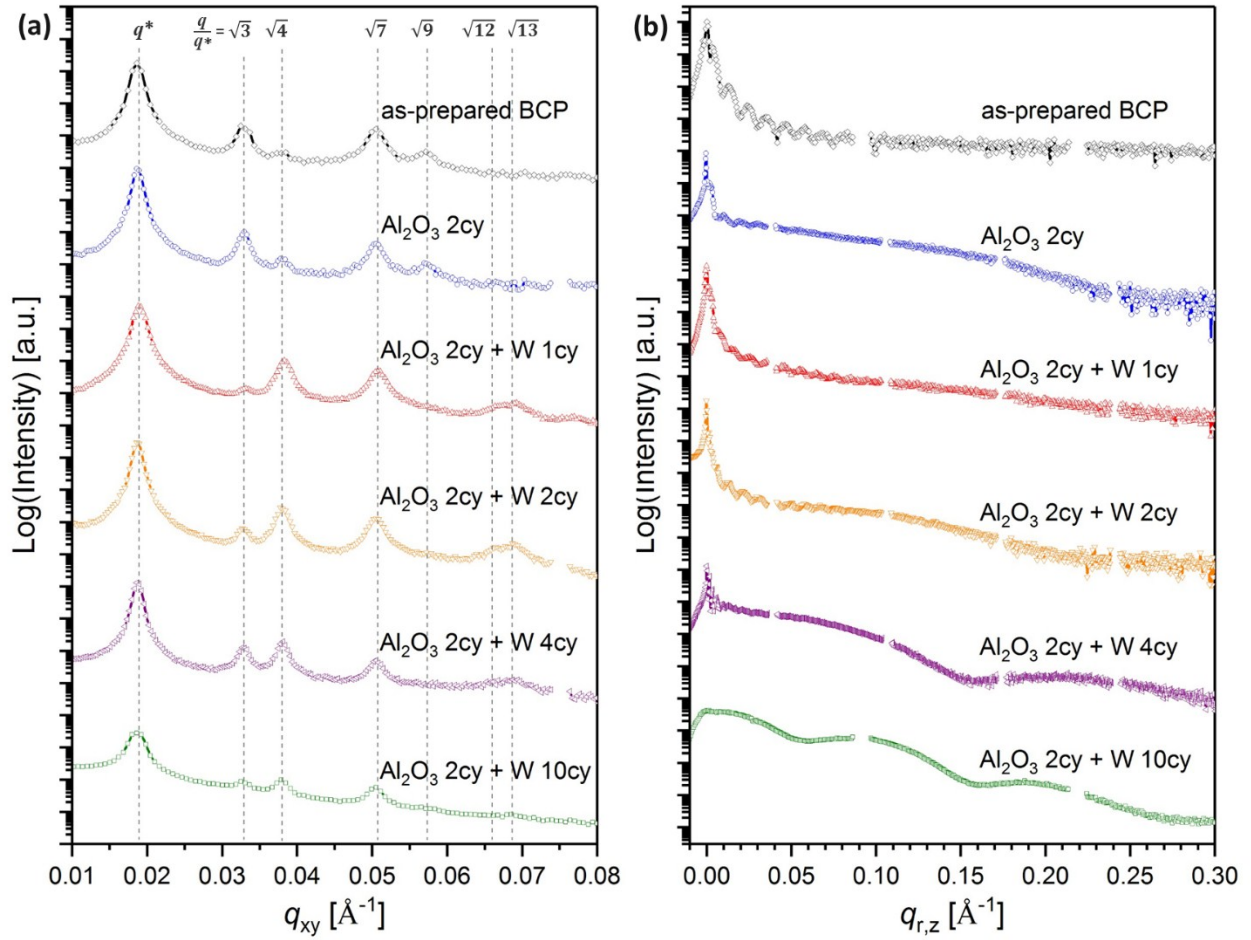

**Figure S2** (a) In-plane and (b) out-of-plane line profiles of GISAXS data (displayed at Figure 2 in the main text) for as-prepared BCP film and samples after sequential infiltration synthesis (SIS) of  $\text{Al}_2\text{O}_3$  seed (2 cycles) and subsequent W SIS deposition (1, 2, 4 and 10 cycles). The incident angles ( $\alpha_i$ ) of the X-ray beam with respect to the film surface plane were  $0.10^\circ - 0.11^\circ$  as indicated at Figure 2 in the main text. In-plane and out-of-plane line profiles were extracted along the  $q_{xy}$  direction near the reflected direct beam and the  $q_{r,z}$  direction at the primary diffraction peak, respectively. Self-assembled BCP film of PS-*b*-PMMA with  $M_n = 46\text{k}/21\text{k}$  was used as a template.

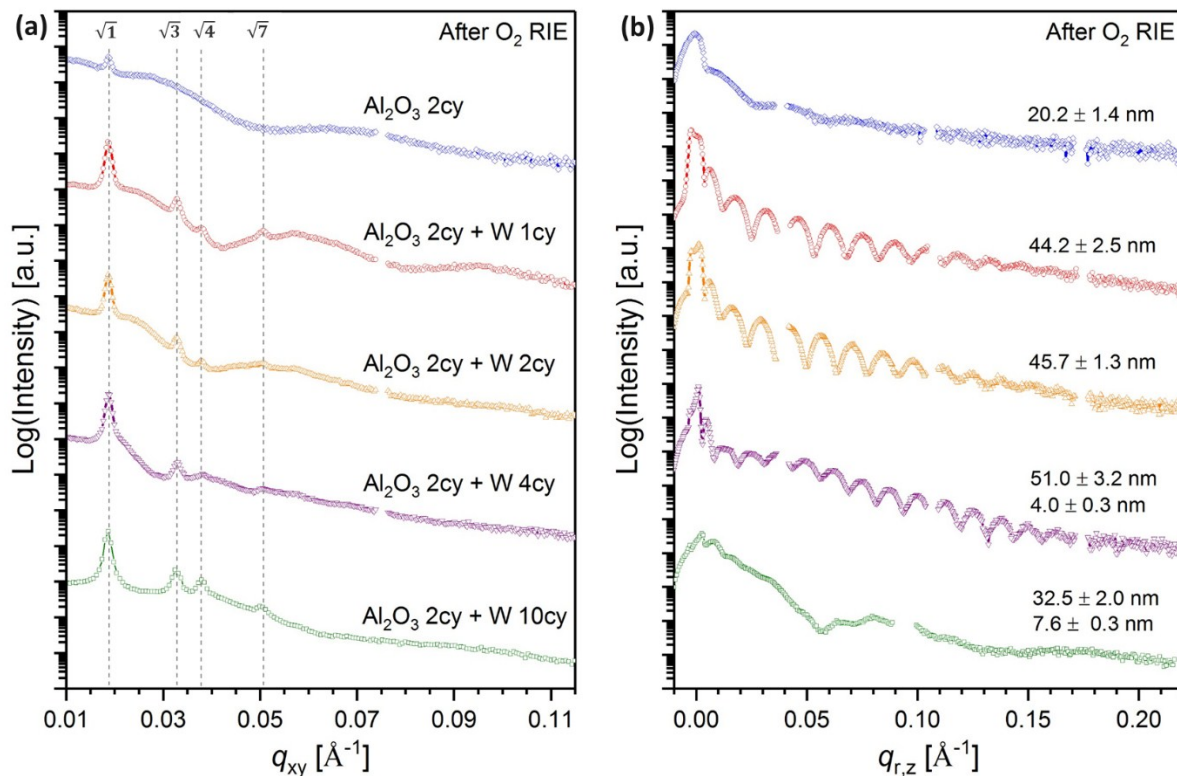

**Figure S3** (a) In-plane and (b) out-of-plane line profiles of GISAXS data (displayed at Figure 3) for nanostructured samples after  $\text{Al}_2\text{O}_3$  seed SIS (2 cycles) and following W SIS deposition (1, 2, 4 and 10 cycles) and subsequent  $\text{O}_2$  reactive ion etching (RIE). The incident angles ( $\alpha_i$ ) of X-ray beam against the films were  $0.09^\circ - 0.10^\circ$ . In-plane and out-of-plane line profiles were extracted along the  $q_{xy}$  direction near the reflected direct beam and the  $q_{r,z}$  direction at the primary diffraction peak, respectively. The film thicknesses extracted from out-of-plane line profiles are listed in (b). Self-assembled BCP film of PS-*b*-PMMA with  $M_n = 46\text{k}/21\text{k}$  was used as a template.



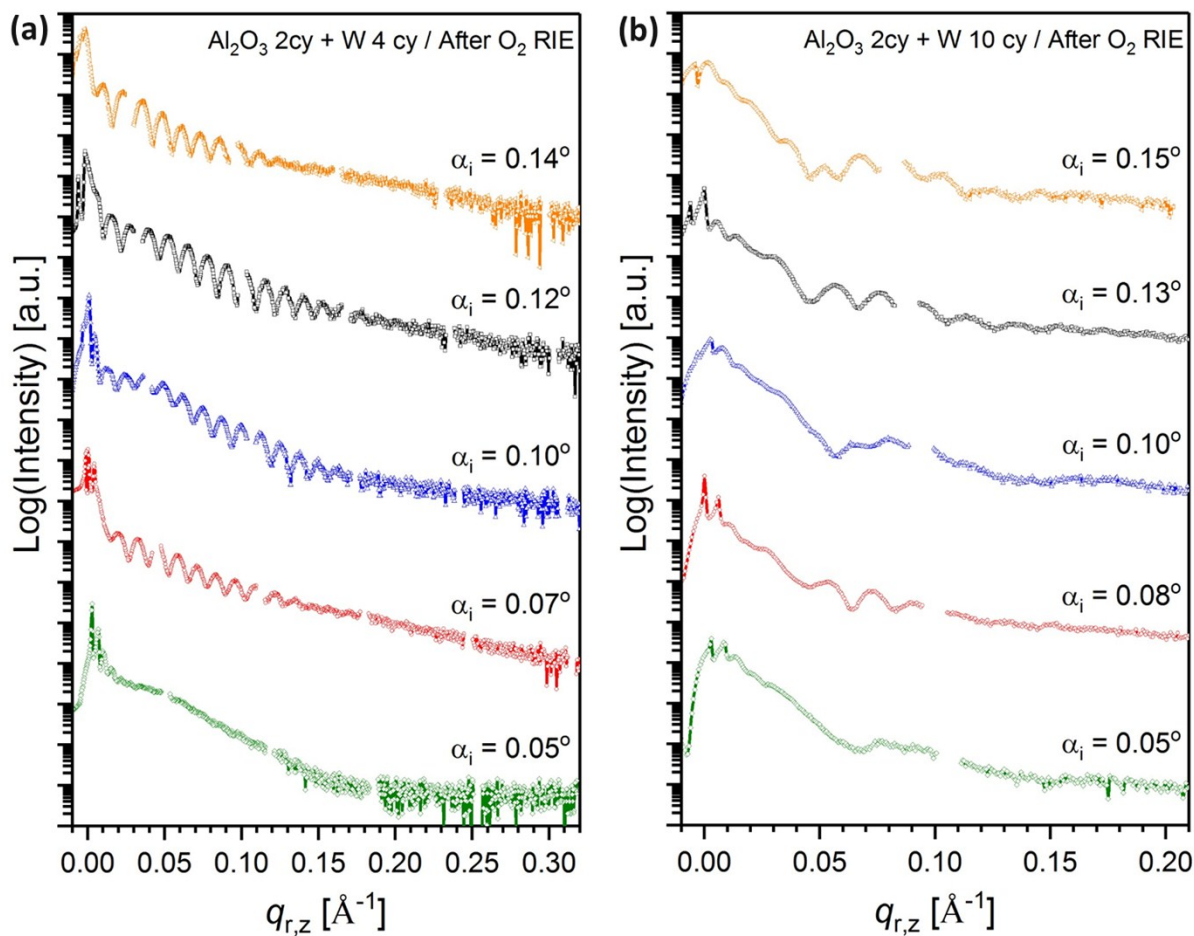

**Figure S4** Out-of-plane line profiles of GISAXS data for nanostructured samples after  $\text{Al}_2\text{O}_3$  seed SIS (2 cycles), then W SIS (a) 4 cycles and (b) 10 cycles, and subsequent  $\text{O}_2$  RIE. The incident angle ( $\alpha_i$ ) of X-ray beam against the films was scanned from  $0.05^\circ$  to  $0.15^\circ$ . Profiles were extracted along the  $q_{r,z}$  direction at the primary diffraction peak. Self-assembled BCP film of PS-*b*-PMMA with  $M_n = 46\text{k}/21\text{k}$  was used as a template.

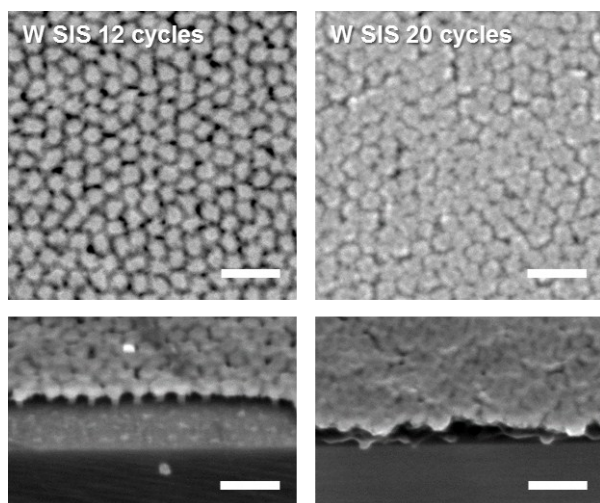

**Figure S5** Plan-view / cross-sectional Scanning electron microscopy images of the samples prepared by  $\text{Al}_2\text{O}_3$  SIS 2 cycles and W SIS 12 and 20 cycles and subsequent  $\text{O}_2$  RIE, respectively. The inset scale bars indicate 100 nm. Self-assembled BCP film of  $\text{PS-}b\text{-PMMA}$  with  $M_n = 46\text{k}/21\text{k}$  was used as a template.

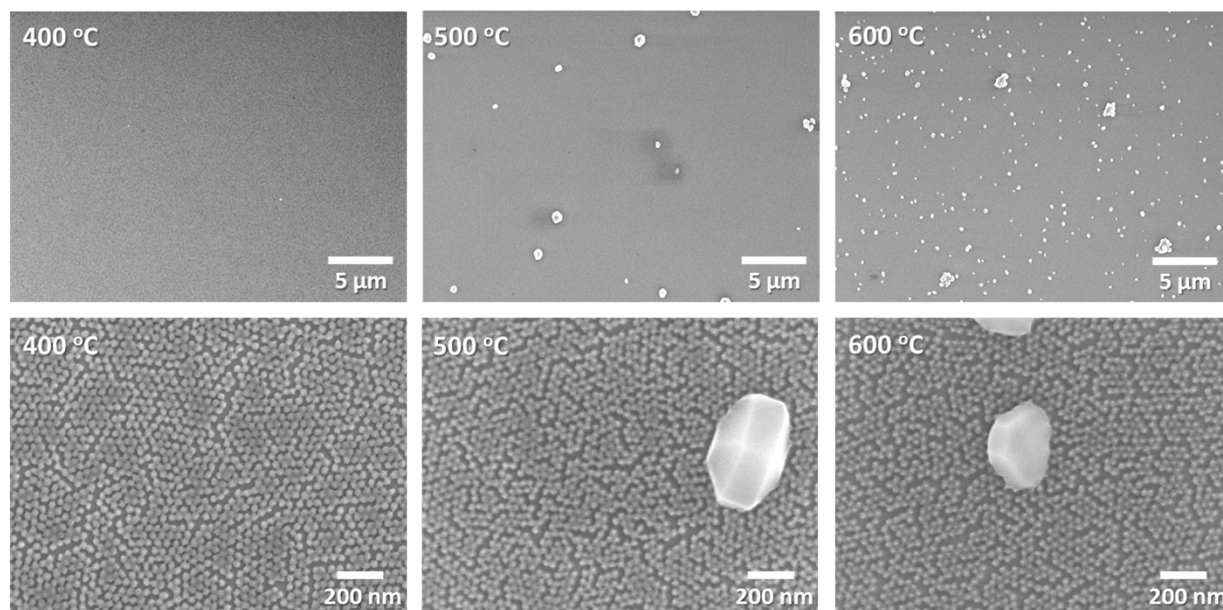

**Figure S6** Scanning electron microscopy (SEM) images of the samples prepared by  $\text{Al}_2\text{O}_3$  SIS 2 cycles and W SIS 10 cycles and subsequent  $\text{O}_2$  RIE, then lastly annealed at 400 °C, 500 °C and 600 °C in air for 3 hours, respectively. Self-assembled BCP film of  $\text{PS-}b\text{-PMMA}$  with  $M_n = 46\text{k}/21\text{k}$  was used as a template.
